1 Title page

2 **Oxidative stress in retinal pigment epithelial cells increased endogenous complement-dependent**  
3 **inflammatory and angiogenic responses - independent from exogenous complement sources**

4 Timon-Orest Trakkides<sup>1</sup>, Nicole Schäfer<sup>1</sup>, Maria Reichenthaler<sup>1</sup>, Konstanze Kühn<sup>1</sup>, Volker Enzmann<sup>2</sup>,  
5 Diana Pauly<sup>1\*</sup>

6 1 Experimental Ophthalmology, Eye clinic, University Hospital Regensburg, Regensburg,  
7 Germany

8 2 Department of Ophthalmology, University Hospital of Bern and Department of  
9 Biomedical Research, University of Bern, Bern, Switzerland.

10 \* corresponding author: [diana.pauly@ukr.de](mailto:diana.pauly@ukr.de), University Hospital Regensburg, Eye clinic,  
11 Experimental Ophthalmology, Franz-Josef-Strauss-Allee 11, Regensburg, 93053, Germany

12

13 *Keywords:* oxidative stress, retinal pigment epithelial cells, complement system, inflammasome,  
14 *foxp3*, olaparib

15

16

17 **HIGHLIGHTS**

- 18       • Oxidative stress accumulates complement proteins and receptors in RPE cells
- 19       • Oxidative stress activates the RPE inflammasome without external complement proteins
- 20       • Oxidative stress increases *foxp3* expression and IL-8/VEGF secretion in RPE cells
- 21       • Olaparib enhances pro-inflammatory response of RPE

22

23 **ABSTRACT**

24 Oxidative stress-induced damage of the retinal pigment epithelium (RPE) together with chronic  
25 inflammation has been suggested as major contributors to retinal diseases. Here, we examine the  
26 effects of oxidative stress and endogenous complement components on the RPE and its pro-  
27 inflammatory and –angiogenic responses.

28 The RPE cell line, ARPE-19, treated with H<sub>2</sub>O<sub>2</sub> reduced cell-cell contacts, increased marker for  
29 epithelial–mesenchymal transition but showed less cell death. Stressed ARPE-19 cells increased the  
30 expression of complement receptors CR3 and C5aR1. CR3 was co-localized with cell-derived  
31 complement protein C3, which was observed in its activated form in ARPE-19 cells. C3 as well as its  
32 regulators CFH and properdin accumulated in ARPE-19 cells after oxidative stress independent from  
33 external complement sources. This cell-associated complement accumulation promoted *nlrp3* and  
34 *foxp3* expression and subsequent increased secretion of pro-inflammatory and pro-angiogenic factors.  
35 The complement-associated ARPE-19 reaction to oxidative stress, independent from external  
36 complement source, was increased by the PARP-inhibitor olaparib.

37 Our results indicated that RPE cell-derived complement proteins and receptors are involved in RPE cell  
38 homeostasis following oxidative stress and should be considered as targets for treatment  
39 developments for retinal degeneration.

40

41 **GRAPHICAL ABSTRACT**

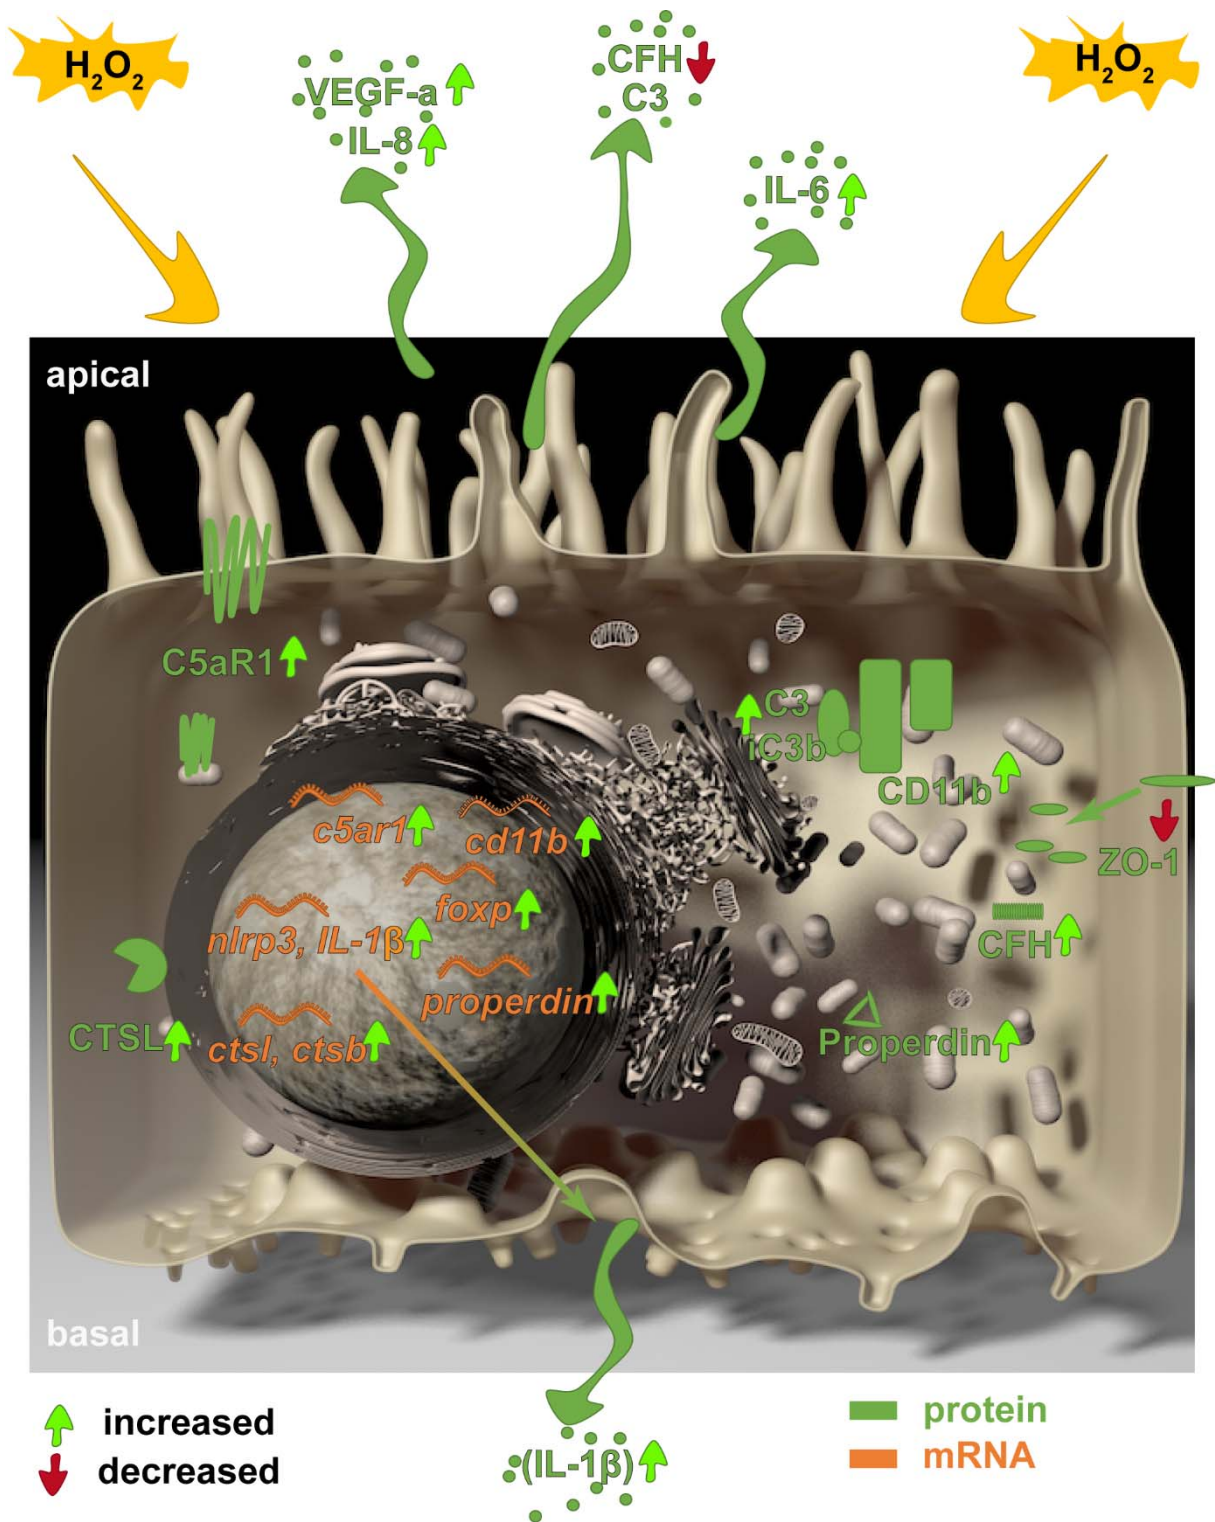

42

43 We show a functional link between oxidative stress, complement receptors, endogenous complement  
 44 proteins, pro-angiogenic and -inflammatory responses in ARPE-19 cells. These effects are independent  
 45 from extracellularly added complement proteins or receptor ligands. We suggest an oxidative stress-  
 46 associated autocrine mechanism of complement receptor regulation in ARPE-19 cells in connection  
 47 with upregulated intracellular proteases.

48

## 49 INTRODUCTION

50 One of the most oxidative environments in the body is the retinal pigment epithelium (RPE) [1], which  
51 is in close contact with the photoreceptors and maintains visual function [2]. Low levels of reactive  
52 oxygen species are required to maintain physiological functions [3], but the combination of exposure  
53 to visible light, elevated metabolic activity, accumulation of oxidized lipoproteins and decreased  
54 antioxidant functions during aging make the retinal tissue vulnerable to oxidative stress [4,5]. Oxidative  
55 damage to the RPE was therefore identified as a contributing factor to different retinal degenerative  
56 diseases such as age-related macular degeneration or Stargardt disease [6–8].

57 In line with this, chronic oxidative stress can involve chronic inflammation subsequently leading to  
58 cellular damage in the RPE/retina [6,9]. Based on genetic polymorphisms in genes of the complement  
59 system, systemic complement activation and local complement deposition in degenerative retinal  
60 tissue a contribution of the complement system to oxidative stress-related retinal degeneration was  
61 hypothesized [7,10,11]. The complement system is composed of over 40 proteins, which bridge the  
62 innate and adaptive immune defence [12]. The main functions are (I) removal of damaged cells, (II)  
63 protection against invading pathogens and (III) attraction of immune cells.

64 Beside the traditional view, evidence is accumulating that complement is also involved in physiological  
65 processes such response to oxidative stress and cellular survival programmes [6]. The complement  
66 system comprises several soluble and membrane-bound proteins and receptors, which can be  
67 produced by a number of cells, including non-immune cells and extrahepatic tissue, and contribute to  
68 the autocrine cell physiology [13]. The role of endogenous complement-dependent regulation of  
69 cellular homeostasis has been extensively studied in the recent years in T-cells [14]. T-cells, B-cells and  
70 human airway epithelial cells contain intracellular stores of C3, which is endogenously cleaved into its  
71 active forms C3a and C3b by intracellular proteases [15–17]. Activated C3 was correlated with the  
72 activation of the NLRP3 inflammasome in T-cells [15], which lead to chronic pro-inflammation. An  
73 antagonising complement modulation was described for regulatory T-cells, where C3aR and C5aR1  
74 activation resulted in the activation of the forkhead box P3 (FOXP3) transcription factor [15,22]. The  
75 FOXP3 transcription factor acts in multimodal fashion and stimulates the release of anti-inflammatory  
76 cytokines and pro-angiogenic factors [22–24].

77 Oxidative stress and inflammasome activation were previously correlated to external complement  
78 activity in RPE cells [6,25]. FOXP3 activation in RPE cells also depended on extracellularly added  
79 complement components [26]. However, RPE-derived complement has not been discussed as source  
80 for NLRP3 or FOXP3 modulation. Complement components can be produced by RPE cells [27] and their  
81 expression is changed under oxidative stress [28–32]. Further activated forms of C3 (C3a), independent  
82 from extracellular complement sources, were also secreted by RPE cells, suggesting a similar function  
83 of the complement system in RPE cells compared to T-cells [18–21].

84

85 In this study, we report that H<sub>2</sub>O<sub>2</sub> stimulated the accumulation of complement protein C3, CFH and  
86 properdin in RPE cells and increased the expression of complement receptors C5aR1 and CR3. This was  
87 accompanied with increased NLRP3 inflammasome activation and FOXP3-associated release of pro-  
88 angiogenic factors. Our results indicate a cell homeostatic function of cell-derived complement  
89 components, independent from external complement receptor ligands.

90



## 91 RESULTS

### 92 Stressed, *in vivo*-like cultivation of ARPE-19 cells

93 We investigated cellular stress response and cell-specific complement expression in a cell line of  
94 human RPE cells, the ARPE-19 cell line. Aged ARPE-19 cells of passage 39 were cultivated under *in vivo*-  
95 like, unstressed conditions. This was visualized by staining of *zonula occludens 1* (ZO-1), an important  
96 protein for cell-cell-contact, showing formation of stable tight junctions and mainly mononuclear,  
97 polarized cell growth on transwell filters (**Fig. 1A, D**). H<sub>2</sub>O<sub>2</sub> treatment resulted in cellular stress  
98 indicated by reduced cell-cell contacts after 4 h (**Fig. 1B**) and a time-dependent translocation of ZO-1  
99 from the cell membrane to the cytoplasm after 24 h (**Fig. 1E**). Evidence of induced cellular stress by  
100 H<sub>2</sub>O<sub>2</sub> were also observed by increased mRNA expression of vimentin (*vim*) and  $\alpha$  smooth muscle actin  
101 ( $\alpha$ -*sma*), typical mesenchymal marker indicating epithelial–mesenchymal transition (**Sup. Fig. 1**) [33–  
102 35]. However, the majority of the ARPE-19 cells did not undergo apoptosis under these non-lethal  
103 oxidative stress conditions, shown by a low number of TUNEL-positive cells (**Fig. 1C, F**).

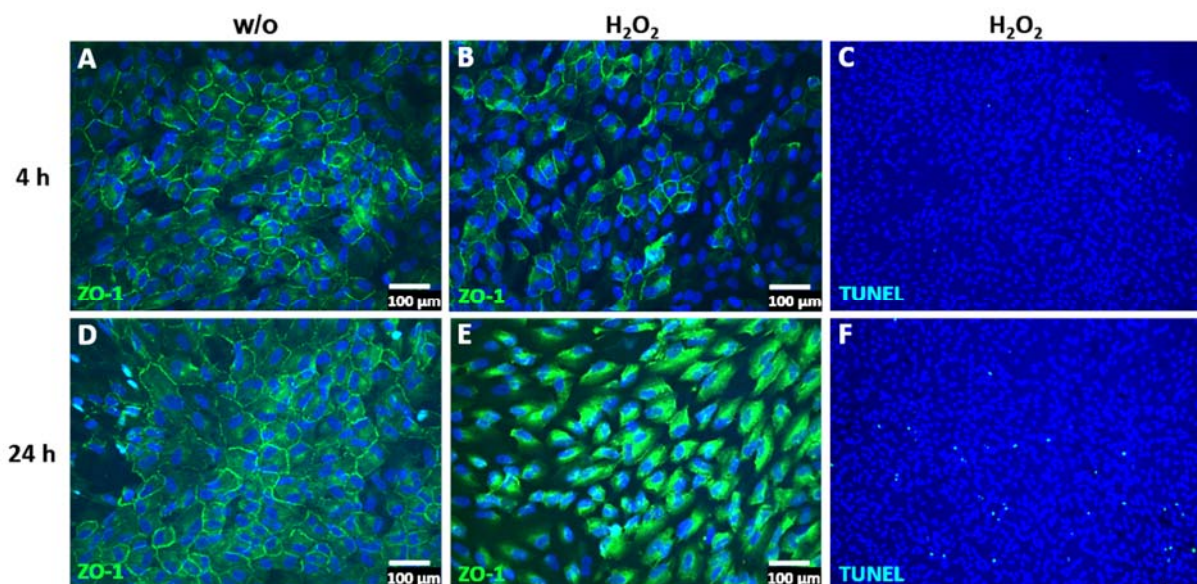

104  
105 **Fig. 1 ARPE-19 cells reduced tight junctions and circumvent apoptosis under oxidative stress.**  
106 (A, D) ARPE-19 cells untreated (w/o) and stressed with H<sub>2</sub>O<sub>2</sub> for (B, C) 4 h or (E, F) 24 h  
107 translocated time-dependently the *zonula occludens* protein 1 (ZO-1, green) from the (A, D)  
108 cell membrane to the (B, E) cytoplasm. (C, F) ARPE-19 cells treated with oxidative stress  
109 showed a minimal TUNEL-positive (light blue) apoptotic reaction after (F) 24 h.  
110

### 111 ARPE-19 cells increase complement receptor expression under oxidative stress

112 ARPE-19 cells express cellular receptors, sense the cellular environment and can react to complement  
113 activation products. Complement receptor 3 (CR3), is a heterodimer integrin consisting of two non-  
114 covalently linked subunits CD11b and CD18 on leukocytes/ microglia and is activated by C3 cleavage  
115 products (iC3b, C3d, C3dg). CD11b has been detected with low expression on mRNA and protein level

116 in ARPE-19 cells (**Fig. 2A, B**). Oxidative stress increased the *cd11b* mRNA expression after 4 h, which  
 117 was also shown on protein level with immunostaining (**Fig. 2A, C**).  
 118 Activation of complement protein C5 is detected by complement receptor C5aR1, which is expressed  
 119 by ARPE-19 cells (**Fig. 2D**). H<sub>2</sub>O<sub>2</sub> treatment increased *c5ar1* expression comparable to *cd11b* expression  
 120 (**Fig. 2D – F**). C5aR1 protein accumulation was observed after 4 h at the cell nuclei (**Fig. 2F**), which was  
 121 more distributed in/on the cell after 24 h (**Fig. 2G**). Increased C5aR1 protein level was also confirmed  
 122 in Western blots (**Fig. 2H, I**).  
 123 Transcription levels of complement receptor *c3aR* was not significantly changed in H<sub>2</sub>O<sub>2</sub>-treated ARPE-  
 124 19 cells (**Sup. Fig. 2A**).

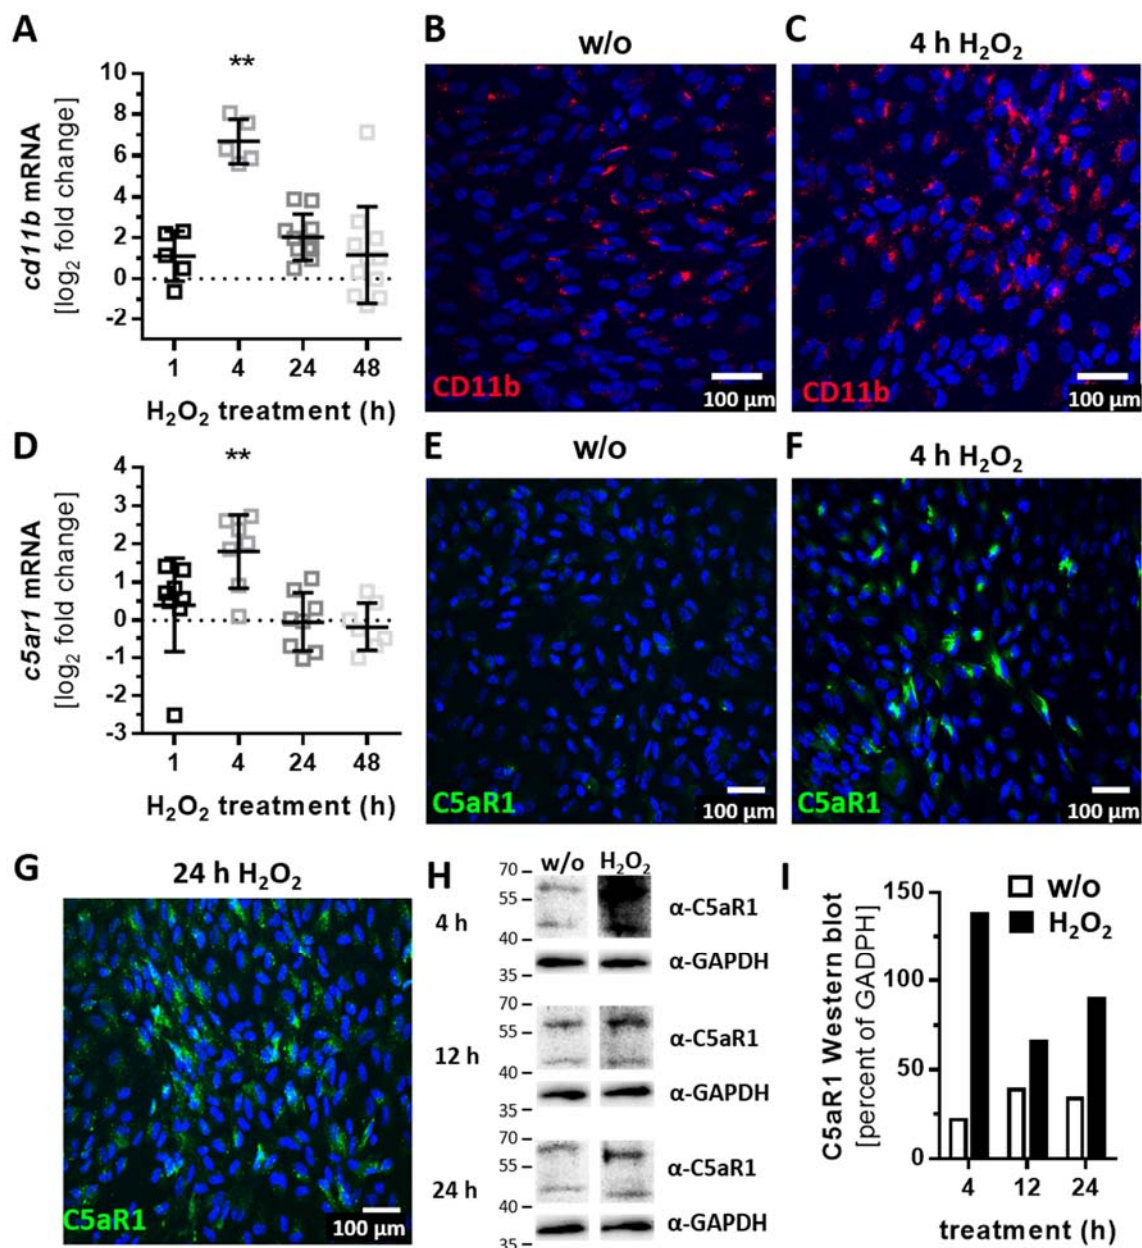

125  
 126  
 127

**Fig. 2** Oxidative stress increased expression of complement receptor subunit CD11b and C5aR1 in ARPE-19 cells.



128 (A, D) *Cd11b* and *c5aR1* mRNA expression was increased 4 h following H<sub>2</sub>O<sub>2</sub> treatment. This  
 129 effect was confirmed on protein level by immunohistochemistry using (B, C) anti-CD11b (red)  
 130 and (E – G) anti-C5aR1 (green) antibodies. (H) Western Blots of ARPE-19 cell lysates detected  
 131 C5aR1 between 40 – 60 kDa after 4 – 24 h H<sub>2</sub>O<sub>2</sub> treatment. (I) Quantitatively, C5aR1  
 132 expression was increased in H<sub>2</sub>O<sub>2</sub> treated cells in Western blots. (A, D) Mean with standard  
 133 deviation is shown, \*\* p < 0.01 unpaired, two-tailed, parametric t-test, dotted line depicts  
 134 untreated control, (B, E, H, I) w/o untreated control.  
 135

### 136 Complement proteins accumulated in ARPE-19 cells under oxidative stress

137 Complement proteins, which can modulate the activity of complement receptors at the RPE, are locally  
 138 produced in the retina [27,36] and by RPE cells (Fig. 3, Sup. Fig. 2B – K). The mRNA expression and  
 139 protein levels of the stabilizing complement regulator properdin were increased after 24 h of H<sub>2</sub>O<sub>2</sub>  
 140 treatment (Fig. 3A – D), but apical properdin secretion was not detected (Sup. Fig. 3A). This indicated  
 141 a properdin storage in the stressed ARPE-19 cells (Fig. 3B – D).

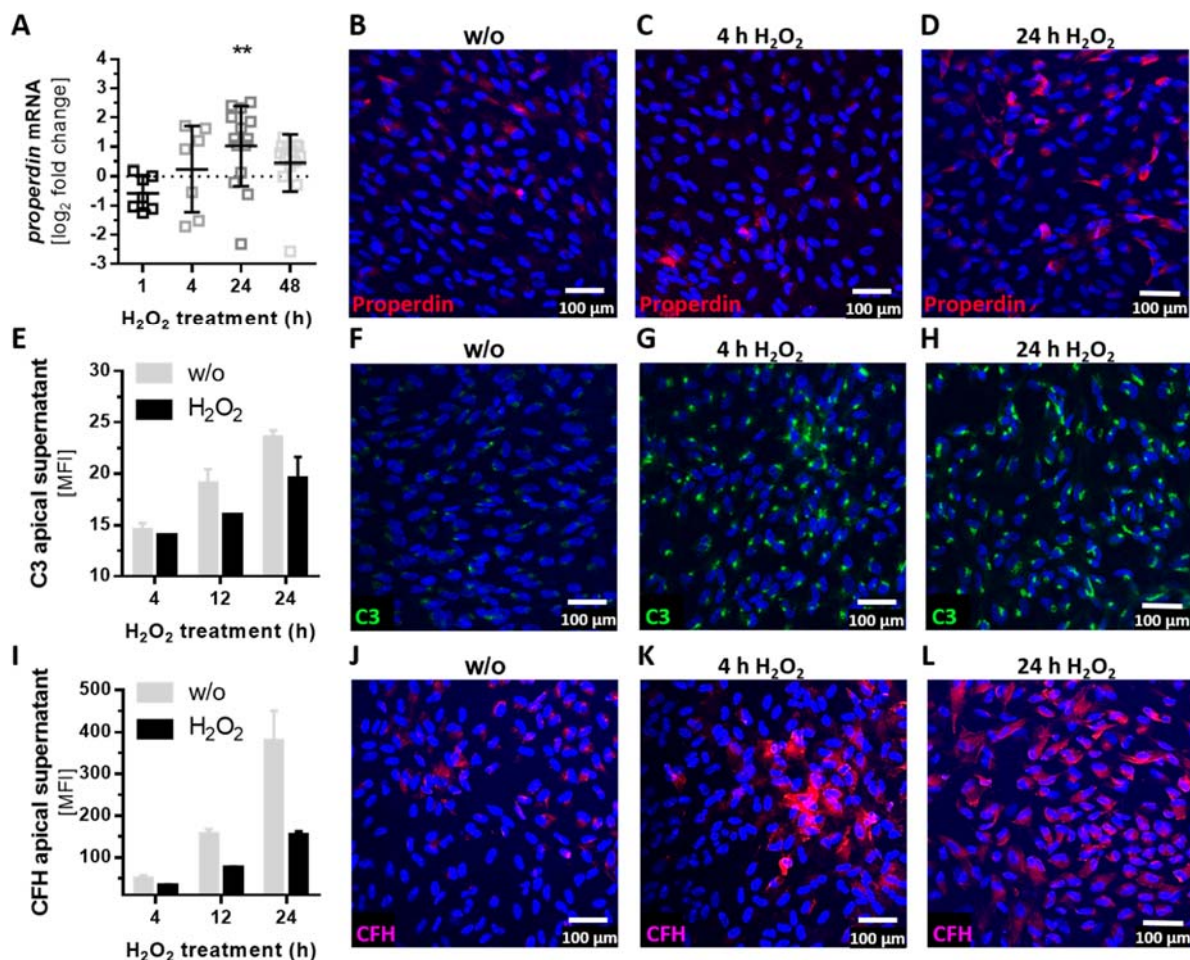

142  
 143 **Fig. 3 Oxidative stress induced complement component accumulation in ARPE-19 cells.**  
 144 (A) The *properdin* mRNA level was increased 24 h following H<sub>2</sub>O<sub>2</sub> treatment. This effect was  
 145 confirmed on protein level by immunohistochemistry using an (B – D) anti-properdin (red)  
 146 antibody. (E) C3 and (I) CFH protein concentration in the apical supernatant of ARPE-19 cells  
 147 decreases following H<sub>2</sub>O<sub>2</sub> treatment. Immunohistochemistry using (F – H) anti-C3 (green) and  
 148 (J – L) anti-CFH (purple) antibodies showed an increase of cell-associated (G, H) C3 and (K, L)  
 149 CFH after oxidative stress treatment. (A, E, I) Mean with standard deviation is shown, (A) \*\*

150  $p \leq 0.01$  unpaired, two-tailed, parametric t-test, dotted line depicts untreated control, (**E, B, F,**  
151 **I, J**) w/o untreated control.

152

153 Transcription levels of additionally tested complement components (*c3*, *c4a*, *c4b*, *cfb*, *cfb*, *cfb*, *c5*), soluble  
154 (*cfh*, *cfi*) and membrane-bound complement regulators (*cd46*, *cd59*) did not change under oxidative  
155 stress conditions (**Sup. Fig. 2B – K**).

156 However, we observed a change in cellular accumulation and modulated secretion of complement  
157 components on protein level by oxidative stress (**Fig. 3E – L**). Central complement component *c3* was  
158 not regulated on mRNA expression by oxidative stress (**Sup. Fig. 2B**), but we detected an increase of  
159 cellular C3 in immunostainings and a decrease of C3 secretion into the apical supernatant of ARPE-19  
160 cells (**Fig. 3E – H**). Secretion of C3 was more observable in younger compared to older ARPE-19 cells  
161 treated with  $H_2O_2$  (**Sup. Fig. 3B**). A similar effect of cellular complement component accumulation and  
162 reduced secretion was detectable for complement regulator CFH (**Fig. 3I – L, Sup. Fig. 3C**). Thus, the  
163 mRNA expression was not changed under oxidative stress (**Sup. Fig. 2H**).

164

#### 165 **Autocrine complement receptor activation following oxidative stress is correlated with the release** 166 **of pro-inflammatory and pro-angiogenic factors**

167 Intracellular complement proteins and cellular complement receptors were previously associated with  
168 an autocrine regulation of cell differentiation and cell physiology in T-cells as well as lung epithelial  
169 cells [17,37]. In line with this we found a co-localization of CD11b and C3 in ARPE-19 cells (**Fig. 4A, B**)  
170 and activated C3 fragments ( $C3b \alpha'$ ,  $C3d$ ) in the ARPE-19 cells (**Fig. 4C**), without adding any external  
171 complement source.

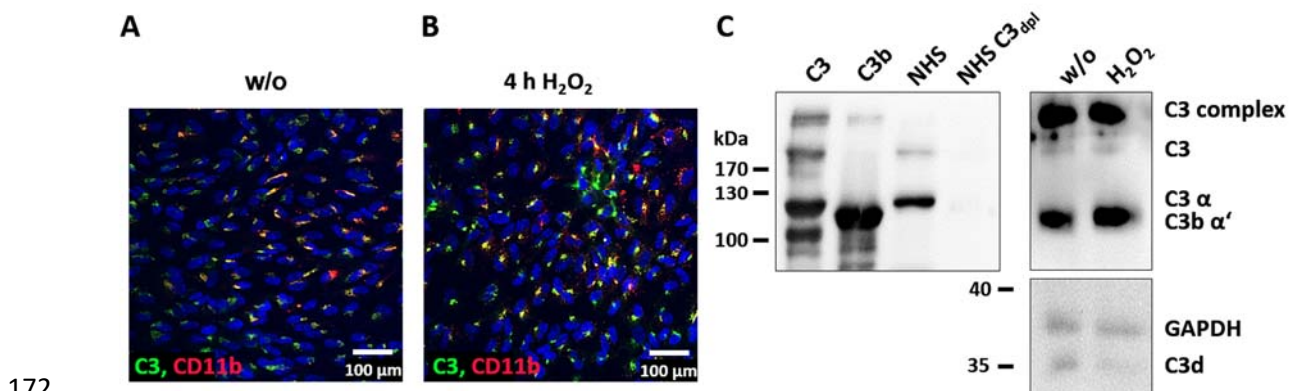

172 **Fig. 4 C3 and complement receptor CR3 are co-localized in ARPE-19.**  
173 **(A)** Unstressed (w/o) and **(B)**  $H_2O_2$  treated ARPE-19 cells were stained with anti-C3 (green) and  
174 anti-CD11b (red) antibodies. Overlapping staining signals (yellow) suggested a co-localization  
175 of C3 and CD11b. **(C)** C3 and activation products ( $C3b \alpha'$  and  $C3d$ ), were detected in untreated  
176 and  $H_2O_2$  treated ARPE-19 cells, together with native C3, C3b, human serum (NHS) and C3  
177 depleted human serum (NHS  $C3_{dpl}$ ), using Western Blot under reducing conditions.  
178

179

180 Intracellular cleavage of complement proteins into active fragments, independent from the systemic  
181 complement cascade, can be mediated by intracellular proteases, as cathepsin B (CTSB) or cathepsin L  
182 (CTSL) [14,15]. Both proteases were expressed by ARPE-19 cells and they were upregulated following  
183 oxidative stress (**Fig. 5**). The expression of *ctsb* and *ctsl* mRNA was increased after 24 h of H<sub>2</sub>O<sub>2</sub>  
184 treatment (**Fig. 5A, B**). We confirmed the higher concentration of CTSL in ARPE-19 cells under stress  
185 conditions also on protein level (**Fig. 5C, D**).

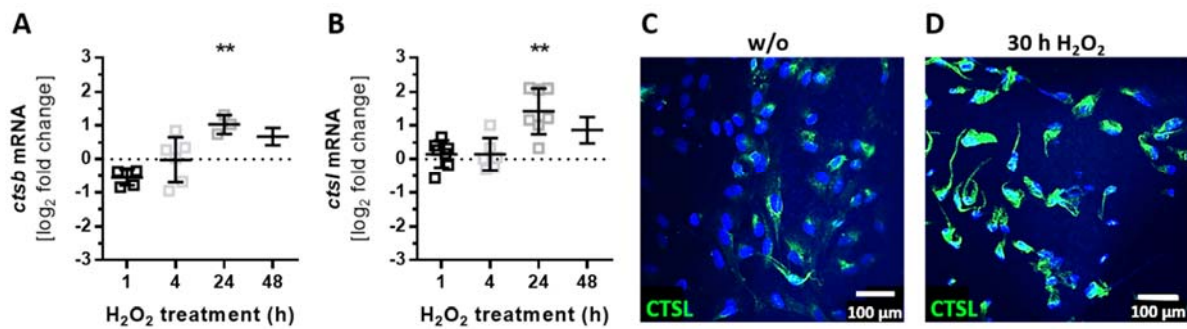

186  
187 **Fig. 5 Expression of intracellular proteases is increased by oxidative stress in ARPE-19.**  
188 (A) *Ctsb* and (B) *ctsl* mRNA expression increased 24 h following H<sub>2</sub>O<sub>2</sub> treatment. This effect was  
189 confirmed on protein level in immunostainings using an (C, D) anti-CTSL (green) antibody. (A,  
190 B) Mean with standard deviation is shown, \*\*  $p \leq 0.01$  unpaired, two-tailed, parametric t-test,  
191 dotted line depicts untreated control, (C) w/o untreated control.  
192

193 Activation of complement receptors on the one hand can induce inflammasome activation and on the  
194 other hand can regulate the mTOR-pathway involving the FOXP3 transcription factor in T- and RPE cells  
195 [25,26,38], the well-coordinated interplay of complement receptor signalling controls the pro- and  
196 anti-inflammatory cytokine release [25,39]. After detection of cell-derived C3 co-localized with CD11b,  
197 its activation products C3b and C3d (**Fig. 4**) as well as H<sub>2</sub>O<sub>2</sub> dependent regulation of complement  
198 receptors (**Fig. 2**) and cellular complement protein accumulation (**Fig. 3**), we supposed also an  
199 autocrine, complement-dependent role of the NLRP3 inflammasome and FOXP3 in ARPE-19 cells  
200 treated with H<sub>2</sub>O<sub>2</sub> to induce oxidative stress. This regulation would be independent of blood-derived  
201 complement components and involves release of cytokines and growth factors in stressed ARPE-19  
202 cells (**Fig. 6**).

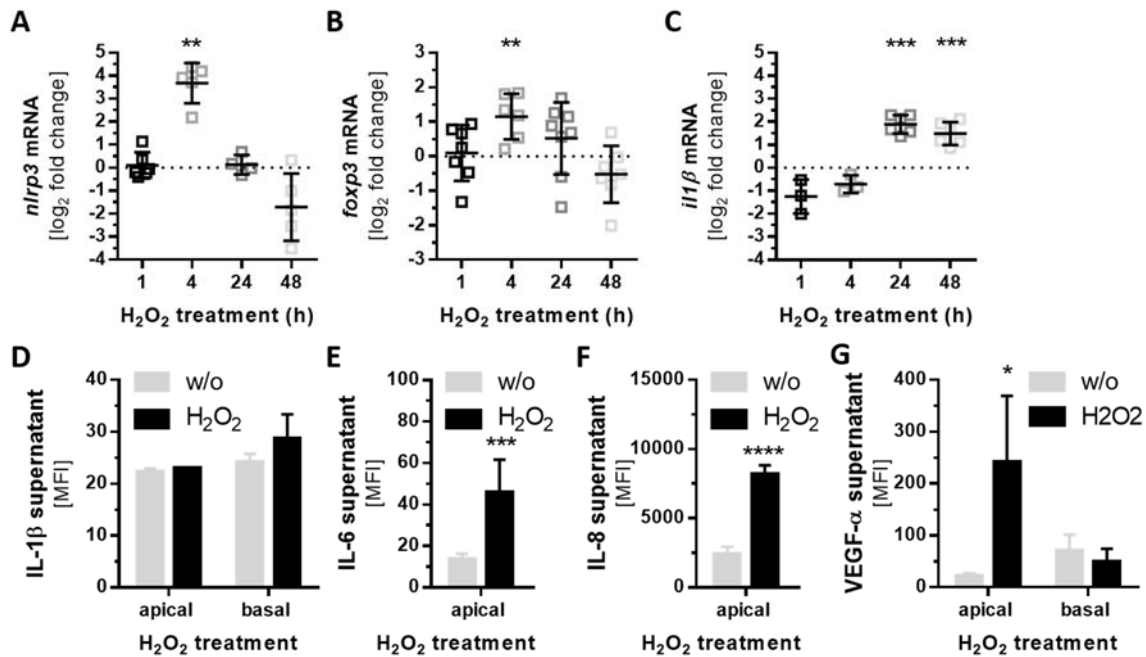

**Fig. 6 Increased *nlrp3* and *foxp3* mRNA expression correlates with pro-inflammatory and pro-angiogenic factor secretion.**

(A) *Nlrp3*, (B) *foxp3* and (C) *il1b* mRNA levels increased either (A, B) 4 h or (C) 24 h and 48 h following H<sub>2</sub>O<sub>2</sub> treatment. Pro-inflammatory cytokine release of (D) IL-1β (after 4 h) and (E) IL-6 (after 48 h) was detected in stressed ARPE-19 cells. This was correlated with an enhanced secretion of pro-angiogenic factors (F) IL-8 (after 48 h) and (G) VEGF-α (after 4 h) H<sub>2</sub>O<sub>2</sub> treated cells. MFI mean fluorescence intensity. Mean with standard deviation is shown, \* p<sub>≤</sub> 0.05, \*\* p<sub>≤</sub> 0.01, \*\*\* p<sub>≤</sub> 0.001, \*\*\*\* p<sub>≤</sub> 0.0001 unpaired, two-tailed, parametric t-test, (A, B, C) dotted line depicts untreated control, (D – G) w/o untreated control.

Indeed, we detected an increased expression of *nlrp3* and *foxp3* mRNA after 4 h of H<sub>2</sub>O<sub>2</sub> treatment (Fig. 6A, B). A subsequent enhanced expression of *il1b* mRNA after 24 h and 48 h indicated the activation of the NLRP3-inflammasome in stressed ARPE-19 cells (Fig. 6C), thus the mRNA expression of *il18* was not changed (Sup. Fig. 2L). Consequently, we found higher pro-inflammatory cytokine levels in H<sub>2</sub>O<sub>2</sub> treated ARPE-19 cell supernatant compared to untreated control (Fig. 6D – E). IL-1β was slightly increased shortly after treatment (4 h), while IL-6 was significantly elevated in supernatant of stressed RPE cells (Fig. 6D).

Increased *foxp3* expression is an attribute of anti-inflammatory regulatory T-cells, which secrete mainly TGF-β and IL-10. We did not detect a change in *tgfb* expression (Sup. Fig. 2M) or IL-10 secretion (data not shown) by H<sub>2</sub>O<sub>2</sub> treated ARPE-19 cells. Therefore, we assumed a pro-angiogenic function of *foxp3* in the cells as previously reported [23,24]. In line with this, we observed an increase of IL-8 (after 48 h) and VEGF-α (after 4 h) secretion in stressed ARPE-19 cells (Fig. 6F, G). This correlation between complement components, *foxp3* expression and pro-angiogenic reaction in RPE cells needs to be further investigated.



228 [As a side note: IL-17, IFN  $\gamma$ , IL-18, IL-2 and TNF- $\alpha$  were not detected in the apical and basal supernatant  
 229 of 4 h, 24 h and 48 h untreated and H<sub>2</sub>O<sub>2</sub> treated ARPE-19 cells (data not shown).]

230

231 **Olaparib boosted the pro-inflammatory response of ARPE-19 cells to oxidative stimuli**

232 Oxidative stress-induced cellular reactions were previously ameliorated by an approved anti-cancer  
 233 drug olaparib, which is an inhibitor of the poly(ADP-ribose) polymerase (PARP) [40–42]. We  
 234 investigated the effect of olaparib on H<sub>2</sub>O<sub>2</sub>-dependent mRNA expression changes of complement  
 235 receptors, components and inflammation-related transcripts (**Fig. 7, Sup. Fig. 4**). Oxidative stress  
 236 increased expression of *cd11b*, *c5ar1* and *nlrp3* after 4 h of H<sub>2</sub>O<sub>2</sub> treatment, this was further enhanced  
 237 by olaparib-treatment (**Fig. 7A, B, C**). An increase of *properdin* and *ctsb* transcripts was observed after  
 238 24 h following oxidative stress alone (**Fig. 3A, 5A**). A combination of H<sub>2</sub>O<sub>2</sub> and olaparib accelerated this  
 239 reaction with a significant increase of *properdin* and *ctsb* mRNA expression already after 4 h (**Fig. 7D,**  
 240 **E**). The expression of *cfb* (**Sup. Fig. 2F**) was not modulated under oxidative stress, however H<sub>2</sub>O<sub>2</sub> and  
 241 olaparib together increased the *cfb* transcript level (**Fig. 7F**). Olaparib did not interfere with  
 242 transcription of *foxp3* (**Fig. 7G**) and other transcripts (*c3*, *c4a*, *c5*, *cfb*, *cfh*, *cfi*, *c3ar*, *ctsl*) (**Sup. Fig. 4**) in  
 243 ARPE-19 cells treated with H<sub>2</sub>O<sub>2</sub>.

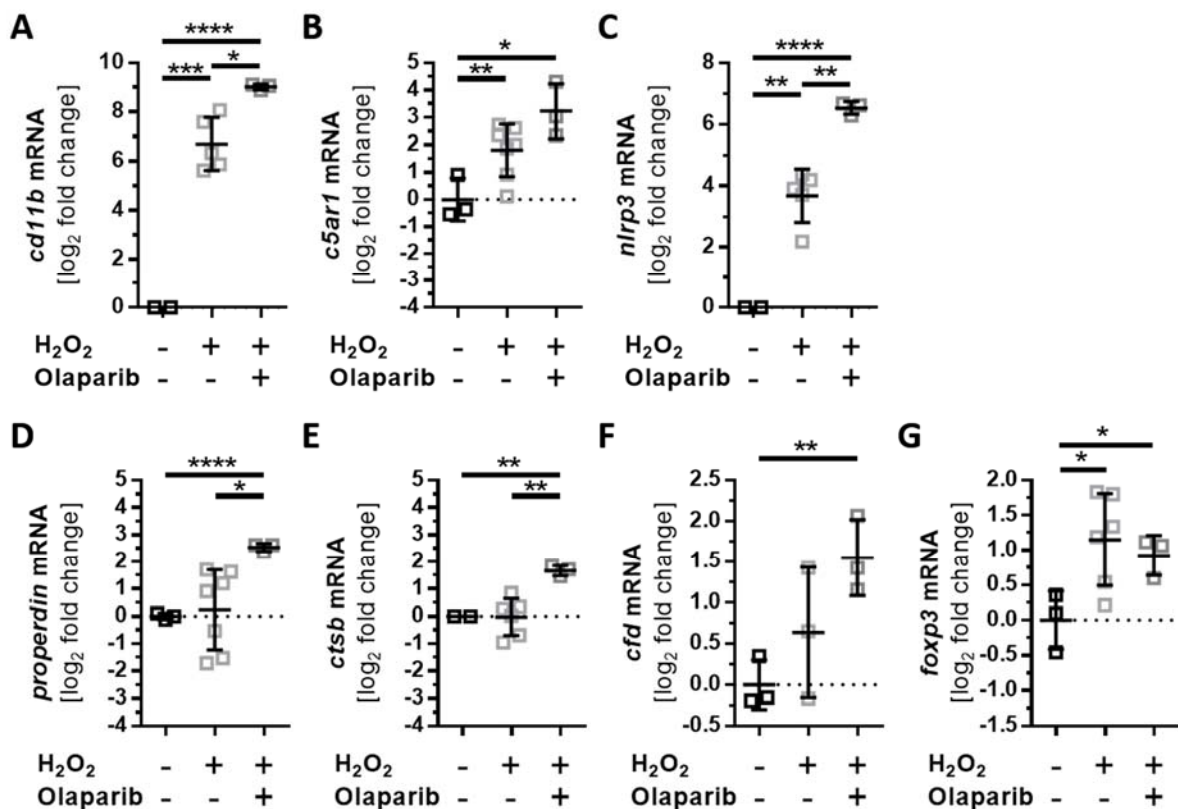

244

245 **Fig. 7 Olaparib enhanced oxidative stress dependent expression changes in ARPE-19 cells.**



246 ARPE-19 cells were treated for 4 h with H<sub>2</sub>O<sub>2</sub> and the effect of simultaneously added olaparib  
247 on transcription was investigated. **(A)** *Cd11b*, **(C)** *nlrp3*, **(D)** *properdin* and **(E)** *ctsb* transcripts  
248 were significantly increased in olaparib-treated, stressed cells compared to stressed cells  
249 alone. **(B)** *C5aR1*, **(F)** *cfp* and **(G)** *foxp3* mRNA expression was not significantly changed in  
250 stressed ARPE-19 cells following olaparib addition. Mean with standard deviation is shown, \*  
251 p ≤ 0.05, \*\* p ≤ 0.01, \*\*\* p ≤ 0.001, \*\*\*\* p ≤ 0.0001 unpaired, two-tailed, parametric t-test,  
252 dotted line depicted untreated control.  
253

## 254 DISCUSSION

255 The RPE is exposed to high-energy light and it conducts phagocytosis of oxidized photoreceptor outer  
256 segments, both is accompanied by a rapid release of reactive oxygen species [6,43,44]. Reactive oxygen  
257 species, including H<sub>2</sub>O<sub>2</sub>, are on the one hand major cellular stressors [6,45] and, on the other hand,  
258 cellular survival factors [3,46]. Antioxidants are decreased in light-exposed retinae, allowing the intra-  
259 ocular accumulation of H<sub>2</sub>O<sub>2</sub> [47]. We used H<sub>2</sub>O<sub>2</sub> treatment to mimic physiological oxidative stress in  
260 serum-free cultivated RPE cells to investigate the endogenous complement response in RPE cells  
261 independent from external complement sources [48,49].

262 Oxidative stress increased the concentration of complement regulators CFH, properdin and of the  
263 central complement protein C3 in RPE cells time-dependently without access to any extracellular  
264 complement source. Previous studies reported mostly a reduced expression of *cfh* mRNA in RPE cells  
265 exposed to oxidative stress [29–32], but these studies did not include further CFH protein analysis. Our  
266 reported CFH protein accumulation after H<sub>2</sub>O<sub>2</sub> treatment in polarized, monolayer ARPE-19 cells, using  
267 immunohistochemistry, is in contrast to reduced CFH protein detection results in Western Blots of  
268 non-*in vivo*-like cultivated ARPE-19 cells following H<sub>2</sub>O<sub>2</sub> treatment [31].

269 However, it is known that intracellular CFH can enhance the cleavage of endogenously expressed C3  
270 by a cathepsin L (CTSL)-mediated mechanism [50]. The lysosomal protease CTSL and the central  
271 complement protein C3 concentrations were both enhanced under oxidative stress conditions in ARPE-  
272 19 cells. Previous studies of RPE cell-derived complement components only focused on *c3* mRNA  
273 expression, which was not changed under low H<sub>2</sub>O<sub>2</sub> concentrations [51]. We went a step further and  
274 showed that C3 was retained in the RPE cells and less secreted following oxidative stress. This RPE cell  
275 dependent local accumulation of C3 was also shown for ARPE-19 cells treated with cigarette smoke  
276 [28]. If C3 is activated in the blood, this is inhibited by CFH and promoted by complement regulator  
277 properdin. We showed for the first time, that oxidative stress increased *properdin* mRNA expression  
278 in ARPE-19 cells. This resulted in a higher properdin protein concentration in these cells, which could  
279 promote cellular C3 cleavage. In summary, our data described a local production of complement  
280 proteins in RPE cells and an enhanced cellular storage of complement proteins in the cells after H<sub>2</sub>O<sub>2</sub>  
281 treatment. This cellular accumulation suggested an autocrine, cellular function of complement  
282 proteins in RPE cells following oxidative stress.

283 Our studies revealed a co-localization of accumulated, endogenous C3 with complement receptor 3  
284 (CR3, CD11b/CD18) in ARPE-19 cells exposed to oxidative stress and an increase of CR3 after 4 h. CR3  
285 expression had been associated with inflammasome activation as a reaction to complement  
286 components or/and oxidative stress in white blood and RPE cells [52,53]. In agreement with this, the  
287 addition of H<sub>2</sub>O<sub>2</sub> to ARPE-19 cells increased a time-dependent expression of *nlrp3* and *il-1β* mRNA and  
288 subsequently enhanced the secretion of pro-inflammatory cytokines IL-1β and IL-6, which indicated an

289 enhanced inflammasome activity. Inflammasome activation depends on reactive oxygen species and  
290 has been associated with lipid peroxidation end products and phototoxicity in RPE cells [54,55].  
291 Involvement of the complement components in this oxidative stress response of RPE cells had been  
292 only described in relation to extracellular added anaphylatoxins so far [25], but endogenous  
293 complement of RPE cells hasn't been suggested as potential priming factors for the inflammasome. On  
294 the one hand, we detected activated C3 cleavage products in ARPE-19 cells and previous studies  
295 showed that activated C3a can be intracellularly generated in RPE cells independent from the systemic  
296 canonical complement system [18–21]. On the other hand, C3 receptors are expressed and regulated  
297 under oxidative stress in ARPE-19 cells indicating a role of endogenous complement components in  
298 stressed ARPE-19 cells. Cellular C3 is cleaved by lysosomal CTSL [15,50] and NLRP3-inflammasome  
299 activation depended on this CTSL activity [55]. Previously, CTSL inhibition reduced inflammasome  
300 activity in ARPE-19 cells exposed to oxidative stress [56], showing the interaction of cell-specific  
301 complement component cleavage and inflammasome activity. It is already known, that endogenous  
302 C3-driven complement activation was required for the IL-1 $\beta$  and IL-6, as well as inflammasome  
303 activation in immune cells [57]. Our data suggest now, that this could be also a autocrine mechanism  
304 in RPE cells.

305 Additionally to C3, C5 has been identified as a key player in cell homeostasis [25]. The *c5aR1* receptor  
306 is expressed in RPE cells [58,59] and was increased during oxidative stress. *C5* mRNA expression was  
307 not changed, as the expression of *c3* mRNA. However, the biologically highly active C5a fragment, a  
308 ligand for C5aR1 has a half-life of approximately 1 min [60,61], due to rapid receptor binding. This rapid  
309 signalling might have interfered with our detection scheduled. C5aR1 stimulation is associated with IL-  
310 8 and VEGF-a secretion in ARPE-19 cells [58,59]. Increased secretion of these pro-angiogenic factors  
311 was also observed following the H<sub>2</sub>O<sub>2</sub> stimuli, but the signalling pathway is not exactly known so far. In  
312 regulatory T-cells the transcription factor FOXP3 promotes the expression of IL-8 [23] and in bladder  
313 cancer cells a knock-down of *foxp3* resulted in a reduced expression of *vegf* [24]. *Foxp3* mRNA was  
314 expressed in ARPE-19 cells and increased under oxidative stress conditions. Previous studies showed,  
315 that extracellular C5a can activate FOXP3 in ARPE-19 cells, which was associated with increased IL-8  
316 secretion [26]. We showed that this can be also due to endogenous activation of C5aR1 following  
317 oxidative stress in RPE cells.

318 These changes in expression and cellular complement protein accumulation following oxidative stress  
319 were time-dependent (**Sup. Fig. 5**). The first changes of complement receptor (CR3, C5aR1) and  
320 component (CFH, C3) levels in the RPE cells occurred after 4 h and were accompanied with changes in  
321 *nlrp3* and *foxp3* mRNA expression. Downstream alterations in properdin expression, intracellular  
322 proteases and an increase of epithelial–mesenchymal transition marker as well as loss of tight-

323 junctions were described. This indicates that complement receptor signalling could be involved in early  
324 response of RPE cells to H<sub>2</sub>O<sub>2</sub> treatment.

325 Oxidative stress-related cell damage of ARPE-19 cells and retinal degeneration in mouse models for  
326 RPE degeneration as well as hereditary retinal degeneration were successfully ameliorated using  
327 olaparib in previous studies [40–42]. Olaparib is a clinically developed poly-ADP-ribose-polymerase  
328 inhibitor developed for cancer treatment by blocking the DNA-repair mechanism. ARPE-19 cells were  
329 resistant to H<sub>2</sub>O<sub>2</sub> induced mitochondrial dysfunction and to energy failure, when olaparib was added  
330 [40]. We ask the question if olaparib can also normalize complement-associated pro-inflammatory  
331 expression profiles in H<sub>2</sub>O<sub>2</sub>-treated cells. Surprisingly, olaparib accelerated the effect of oxidative stress  
332 in RPE cells and enhanced the expression of complement receptors, complement components and the  
333 *nlrp3* mRNA. This shows that endogenous complement-related, pro-inflammatory response of ARPE-  
334 19 cells could be correlated with defective DNA repair mechanisms.

335

## 336 **CONCLUSION**

337 Oxidative stress and activation of the complement system cause retinal degeneration, but the  
338 mechanism behind this is still a matter of investigation. We showed for the first time, that oxidative  
339 stress can increase endogenous RPE cell complement components and receptors and that the process  
340 was associated with release of pro-inflammatory and pro-angiogenic factors. Our data offer a stepping  
341 stone for numerous further investigations regarding the function of a cell-associated complement  
342 system in the RPE. Many questions were raised during this project: How are the complement  
343 components activated? What is (are) the signalling pathway(s) of the complement receptors  
344 independent from external complement sources? How are inflammasome regulation and FOXP3  
345 activity modulated by endogenous complement components in RPE cells? Can endogenous  
346 complement factors be targeted to affect cell-associated signalling pathways? These new perspectives  
347 will hopefully help to decipher the function of intracellular complement components in retinal health  
348 and disease and offer new strategies for treatment of retinal degeneration.

## 349 **METHODS**

### 350 **Cell culture and treatment**

351 Human ARPE-19 cells (passage 39; American Type Culture Collection) were cultivated for 6 days in cell  
352 culture flasks with DMEM/F12 (Sigma-Aldrich) and 10% fetal calf serum (FCS; PanBiotech) and 1%  
353 penicillin/ streptomycin (37°C, 5% CO<sub>2</sub>). Cells were trypsinized (0.05% trypsin/ 0.02% EDTA) and seeded  
354 in a concentration of  $1.6 \times 10^5$  cells/cm<sup>2</sup> (passage 39) on mouse laminin (5 µg/cm<sup>2</sup>, Sigma-Aldrich)  
355 coated 0.4 µm pore polyester membrane inserts (Corning). Cells were cultivated for 4 weeks with  
356 apical and basal media exchanges (first day medium with 10% FCS, remaining time medium with 5%  
357 FCS were used). Before treatment FCS concentration was reduced within 3 days from 5% to 0%. ARPE-  
358 19 cells were treated either with 0.5 mM H<sub>2</sub>O<sub>2</sub> for 1, 4, 24 and 48 h, or 0.5 mM H<sub>2</sub>O<sub>2</sub> and 0.01 mM  
359 Olaparib (Biomol, Hamburg, DE) for 4 h.

### 360 **Immunohistochemistry and TUNEL assay**

361 PBS (Sigma-Aldrich) washed, paraformaldehyde (4%, 20 min; Merck) fixated ARPE-19 cells were  
362 permeabilized (PBS/ 0.2% Tween20 (PBS-T), 45 min) and unspecific bindings were blocked (3% BSA  
363 (Carl Roth)/PBS-T, 1 h). Antigens were detected using primary antibody (**Sup. Table 1**, overnight,  
364 3% BSA/PBS-T) and fluorescence-conjugated anti-species antibody (**Sup. Table 1**, 45 min,  
365 3% BSA/PBS). HOECHST 33342 (1:1000) stained DNA. Cells were covered with fluorescenting mounting  
366 medium (Dako, Agilent). Images were taken with a confocal microscope (Zeiss).

367 The TUNEL assay was performed with DeadEnd™ Fluorometric TUNEL System (Promega) on  
368 paraformaldehyde fixated, washed and permeabilized (0.2% Triton X-100 in PBS) cells. Images were  
369 taken with confocal microscope a by Zeiss.

### 370 **RT-qPCR**

371 mRNA was isolated using the NucleoSpin® RNA/Protein kit (Macherey-Nagel). Purified mRNA was  
372 transcribed into cDNA with the QuantiTect® Reverse Transcription Kit (Qiagen). Transcripts of  
373 complement components, receptors and inflammation-associated markers were analyzed using the  
374 Rotor-Gene SYBR® Green PCR Kit either with QuantiTect Primer Assays (**Sup. Table 2**), or in-house  
375 designed primer pairs (Metabion) described in **Sup. Table 3** in the Rotor Gene Q 2plex cyclers (Qiagen).

### 376 **Western Blot**

377 Proteins were purified using RIPA buffer (Sigma-Aldrich) with protease and phosphatase inhibitors  
378 (1:100, Sigma-Aldrich). Samples were dissolved in reducing Laemmli sample buffer and denatured  
379 (95 °C, 10 min). Samples were separated in a 12% SDS-PAGE and transferred on to an activated  
380 polyvinylidene difluoride membrane using a wet blotting system. Membranes were blocked (1 h, 5%



381 BSA/PBS-T) and incubated with the primary antibody (**Sup. Table 1**, overnight, 5% BSA/PBS-T).  
382 Peroxidase-conjugated anti-species antibodies were used for detection (**Sup. Table 1**, 1 h, PBS-T).  
383 WesternSure PREMIUM Chemiluminescent Substrate (LI-COR) visualized the antigen in the Alpha  
384 Innotech Fluor Chem FC2 Imaging System.

### 385 **Multiplex-Immunoassays**

386 Cytokine concentration of basal and apical supernatants of treated and untreated ARPE-19 cells were  
387 determined according to the protocol of a custom ProcartaPlex® multiplex immunoassay kit  
388 (ThermoFisher). Complement components in the cellular supernatant were quantified using the  
389 MILLIPLEX MAP Human Complement Panel (Merck). The read out of the multiplex assay was  
390 performed in a Magpix instrument (Luminex).

### 391 **Statistics**

392 Statistical analysis was performed using GraphPad Prism 7 (GraphPad Software Inc.).

393

394 **REFERENCES**

- 395 [1] D.-Y. Yu, S.J. Cringle, Retinal degeneration and local oxygen metabolism., *Exp. Eye Res.* 80 (2005)  
396 745–51. doi:10.1016/j.exer.2005.01.018.
- 397 [2] O. Strauss, The retinal pigment epithelium in visual function., *Physiol. Rev.* 85 (2005) 845–81.  
398 doi:10.1152/physrev.00021.2004.
- 399 [3] W. Dröge, Free radicals in the physiological control of cell function., *Physiol. Rev.* 82 (2002) 47–  
400 95. doi:10.1152/physrev.00018.2001.
- 401 [4] M.M. Sachdeva, M. Cano, J.T. Handa, Nrf2 signaling is impaired in the aging RPE given an  
402 oxidative insult., *Exp. Eye Res.* 119 (2014) 111–4. doi:10.1016/j.exer.2013.10.024.
- 403 [5] J. Cai, K.C. Nelson, M. Wu, P. Sternberg, D.P. Jones, Oxidative damage and protection of the  
404 RPE., *Prog. Retin. Eye Res.* 19 (2000) 205–21.
- 405 [6] S. Datta, M. Cano, K. Ebrahimi, L. Wang, J.T. Handa, The impact of oxidative stress and  
406 inflammation on RPE degeneration in non-neovascular AMD., *Prog. Retin. Eye Res.* 60 (2017)  
407 201–218. doi:10.1016/j.preteyeres.2017.03.002.
- 408 [7] R.A. Radu, J. Hu, Q. Yuan, D.L. Welch, J. Makshanoff, M. Lloyd, S. McMullen, G.H. Travis, D. Bok,  
409 Complement system dysregulation and inflammation in the retinal pigment epithelium of a  
410 mouse model for Stargardt macular degeneration., *J. Biol. Chem.* 286 (2011) 18593–601.  
411 doi:10.1074/jbc.M110.191866.
- 412 [8] M.M. Teussink, S. Lambertus, F.F. de Mul, M.B. Rozanowska, C.B. Hoyng, B.J. Klevering, T.  
413 Theelen, Lipofuscin-associated photo-oxidative stress during fundus autofluorescence  
414 imaging., *PLoS One.* 12 (2017) e0172635. doi:10.1371/journal.pone.0172635.
- 415 [9] H. Xu, M. Chen, J. V Forrester, Para-inflammation in the aging retina., *Prog. Retin. Eye Res.* 28  
416 (2009) 348–68. doi:10.1016/j.preteyeres.2009.06.001.
- 417 [10] L.M. Pujol-Lereis, N. Schäfer, L.B. Kuhn, B. Rohrer, D. Pauly, Interrelation Between Oxidative  
418 Stress and Complement Activation in Models of Age-Related Macular Degeneration., *Adv. Exp.*  
419 *Med. Biol.* 854 (2016) 87–93. doi:10.1007/978-3-319-17121-0\_13.
- 420 [11] B.H.F. Weber, P. Charbel Issa, D. Pauly, P. Herrmann, F. Grassmann, F.G. Holz, The role of the  
421 complement system in age-related macular degeneration., *Dtsch. Arztebl. Int.* 111 (2014) 133–  
422 8. doi:10.3238/arztebl.2014.0133.
- 423 [12] N.S. Merle, S.E. Church, V. Fremeaux-Bacchi, L.T. Roumenina, Complement System Part I -

- 424 Molecular Mechanisms of Activation and Regulation., *Front. Immunol.* 6 (2015) 262.  
425 doi:10.3389/fimmu.2015.00262.
- 426 [13] R. Lubbers, M.F. van Essen, C. van Kooten, L.A. Trouw, Production of complement components  
427 by cells of the immune system., *Clin. Exp. Immunol.* 188 (2017) 183–194.  
428 doi:10.1111/cei.12952.
- 429 [14] A. Jiménez-Reinoso, A. V Marin, J.R. Regueiro, Complement in basic processes of the cell., *Mol.*  
430 *Immunol.* 84 (2017) 10–16. doi:10.1016/j.molimm.2016.11.011.
- 431 [15] M.K. Liszewski, M. Kolev, G. Le Friec, M. Leung, P.G. Bertram, A.F. Fara, M. Subias, M.C.  
432 Pickering, C. Drouet, S. Meri, T.P. Arstila, P.T. Pekkarinen, M. Ma, A. Cope, T. Reinheckel, S.  
433 Rodriguez de Cordoba, B. Afzali, J.P. Atkinson, C. Kemper, Intracellular complement activation  
434 sustains T cell homeostasis and mediates effector differentiation., *Immunity.* 39 (2013) 1143–  
435 57. doi:10.1016/j.immuni.2013.10.018.
- 436 [16] M. Kremlitzka, A.A. Nowacka, F.C. Mohlin, P. Bompada, Y. De Marinis, A.M. Blom, Interaction  
437 of Serum-Derived and Internalized C3 With DNA in Human B Cells-A Potential Involvement in  
438 Regulation of Gene Transcription., *Front. Immunol.* 10 (2019) 493.  
439 doi:10.3389/fimmu.2019.00493.
- 440 [17] H.S. Kulkarni, M.L. Elvington, Y.-C. Perng, M.K. Liszewski, D.E. Byers, C. Farkouh, R.D. Yusen, D.J.  
441 Lenschow, S.L. Brody, J.P. Atkinson, Intracellular C3 Protects Human Airway Epithelial Cells from  
442 Stress-associated Cell Death., *Am. J. Respir. Cell Mol. Biol.* 60 (2019) 144–157.  
443 doi:10.1165/rcmb.2017-0405OC.
- 444 [18] M.A. Fields, H.E. Bowrey, J. Gong, E.F. Moreira, H. Cai, L. V Del Priore, Extracellular matrix  
445 nitration alters growth factor release and activates bioactive complement in human retinal  
446 pigment epithelial cells., *PLoS One.* 12 (2017) e0177763. doi:10.1371/journal.pone.0177763.
- 447 [19] G. Kaur, L.X. Tan, G. Rathnasamy, N. La Cunza, C.J. Germer, K.A. Toops, M. Fernandes, T.A.  
448 Blenkinsop, A. Lakkaraju, Aberrant early endosome biogenesis mediates complement  
449 activation in the retinal pigment epithelium in models of macular degeneration., *Proc. Natl.*  
450 *Acad. Sci. U. S. A.* 115 (2018) 9014–9019. doi:10.1073/pnas.1805039115.
- 451 [20] L. Wu, X. Tan, L. Liang, H. Yu, C. Wang, D. Zhang, A. Kijlstra, P. Yang, The Role of Mitochondria-  
452 Associated Reactive Oxygen Species in the Amyloid  $\beta$  Induced Production of Angiogenic Factors  
453 by ARPE-19 Cells., *Curr. Mol. Med.* 17 (2017) 140–148.  
454 doi:10.2174/1566524017666170331162616.

- 455 [21] R. Fernandez-Godino, D.L. Garland, E.A. Pierce, A local complement response by RPE causes  
456 early-stage macular degeneration., *Hum. Mol. Genet.* 24 (2015) 5555–69.  
457 doi:10.1093/hmg/ddv287.
- 458 [22] M.G. Strainic, E.M. Shevach, F. An, F. Lin, M.E. Medof, Absence of signaling into CD4<sup>+</sup> cells via  
459 C3aR and C5aR enables autoinductive TGF- $\beta$ 1 signaling and induction of Foxp3<sup>+</sup> regulatory T  
460 cells., *Nat. Immunol.* 14 (2013) 162–71. doi:10.1038/ni.2499.
- 461 [23] M.E. Himmel, S.Q. Crome, S. Ivison, C. Piccirillo, T.S. Steiner, M.K. Levings, Human CD4<sup>+</sup> FOXP3<sup>+</sup>  
462 regulatory T cells produce CXCL8 and recruit neutrophils., *Eur. J. Immunol.* 41 (2011) 306–12.  
463 doi:10.1002/eji.201040459.
- 464 [24] Y.-C. Jou, Y.-S. Tsai, C.-T. Lin, C.-L. Tung, C.-H. Shen, H.-T. Tsai, W.-H. Yang, H.-I. Chang, S.-Y.  
465 Chen, T.-S. Tzai, Foxp3 enhances HIF-1 $\alpha$  target gene expression in human bladder cancer  
466 through decreasing its ubiquitin-proteasomal degradation., *Oncotarget.* 7 (2016) 65403–65417.  
467 doi:10.18632/oncotarget.11395.
- 468 [25] C. Brandstetter, F.G. Holz, T.U. Krohne, Complement Component C5a Primes Retinal Pigment  
469 Epithelial Cells for Inflammasome Activation by Lipofuscin-mediated Photooxidative Damage.,  
470 *J. Biol. Chem.* 290 (2015) 31189–98. doi:10.1074/jbc.M115.671180.
- 471 [26] C. Busch, B. Annamalai, K. Abdusalamova, N. Reichhart, C. Huber, Y. Lin, E.A.H. Jo, P.F. Zipfel, C.  
472 Skerka, G. Wildner, M. Diedrichs-Möhrling, B. Rohrer, O. Strauß, Anaphylatoxins Activate Ca<sup>2+</sup>,  
473 Akt/PI3-Kinase, and FOXO1/FoxP3 in the Retinal Pigment Epithelium., *Front. Immunol.* 8 (2017)  
474 703. doi:10.3389/fimmu.2017.00703.
- 475 [27] D.H. Anderson, M.J. Radeke, N.B. Gallo, E.A. Chapin, P.T. Johnson, C.R. Curletti, L.S. Hancox, J.  
476 Hu, J.N. Ebright, G. Malek, M.A. Hauser, C.B. Rickman, D. Bok, G.S. Hageman, L. V Johnson, The  
477 pivotal role of the complement system in aging and age-related macular degeneration:  
478 hypothesis re-visited., *Prog. Retin. Eye Res.* 29 (2010) 95–112.  
479 doi:10.1016/j.preteyeres.2009.11.003.
- 480 [28] K. Kunchithapautham, C. Atkinson, B. Rohrer, Smoke exposure causes endoplasmic reticulum  
481 stress and lipid accumulation in retinal pigment epithelium through oxidative stress and  
482 complement activation., *J. Biol. Chem.* 289 (2014) 14534–46. doi:10.1074/jbc.M114.564674.
- 483 [29] Z. Wu, T.W. Lauer, A. Sick, S.F. Hackett, P.A. Campochiaro, Oxidative stress modulates  
484 complement factor H expression in retinal pigmented epithelial cells by acetylation of FOXO3.,  
485 *J. Biol. Chem.* 282 (2007) 22414–25. doi:10.1074/jbc.M702321200.

- 486 [30] Q. Bian, S. Gao, J. Zhou, J. Qin, A. Taylor, E.J. Johnson, G. Tang, J.R. Sparrow, D. Gierhart, F.  
487 Shang, Lutein and zeaxanthin supplementation reduces photooxidative damage and modulates  
488 the expression of inflammation-related genes in retinal pigment epithelial cells., *Free Radic.*  
489 *Biol. Med.* 53 (2012) 1298–307. doi:10.1016/j.freeradbiomed.2012.06.024.
- 490 [31] Y. Zhang, Q. Huang, M. Tang, J. Zhang, W. Fan, Complement Factor H Expressed by Retinal  
491 Pigment Epithelium Cells Can Suppress Neovascularization of Human Umbilical Vein Endothelial  
492 Cells: An in vitro Study., *PLoS One.* 10 (2015) e0129945. doi:10.1371/journal.pone.0129945.
- 493 [32] M.C. Marazita, A. Dugour, M.D. Marquioni-Ramella, J.M. Figueroa, A.M. Suburo, Oxidative  
494 stress-induced premature senescence dysregulates VEGF and CFH expression in retinal pigment  
495 epithelial cells: Implications for Age-related Macular Degeneration., *Redox Biol.* 7 (2016) 78–  
496 87. doi:10.1016/j.redox.2015.11.011.
- 497 [33] R. Kalluri, R.A. Weinberg, The basics of epithelial-mesenchymal transition., *J. Clin. Invest.* 119  
498 (2009) 1420–8. doi:10.1172/JCI39104.
- 499 [34] S. Grisanti, C. Guidry, Transdifferentiation of retinal pigment epithelial cells from epithelial to  
500 mesenchymal phenotype., *Invest. Ophthalmol. Vis. Sci.* 36 (1995) 391–405.
- 501 [35] F. Bataille, C. Rohrmeier, R. Bates, A. Weber, F. Rieder, J. Brenmoehl, U. Strauch, S. Farkas, A.  
502 Fürst, F. Hofstädter, J. Schölmerich, H. Herfarth, G. Rogler, Evidence for a role of epithelial  
503 mesenchymal transition during pathogenesis of fistulae in Crohn’s disease., *Inflamm. Bowel Dis.*  
504 14 (2008) 1514–27. doi:10.1002/ibd.20590.
- 505 [36] N. Schäfer, A. Grosche, S.I. Schmitt, B.M. Braunger, D. Pauly, Complement Components Showed  
506 a Time-Dependent Local Expression Pattern in Constant and Acute White Light-Induced  
507 Photoreceptor Damage., *Front. Mol. Neurosci.* 10 (2017) 197. doi:10.3389/fnmol.2017.00197.
- 508 [37] M.P. Reichhardt, S. Meri, Intracellular complement activation-An alarm raising mechanism?,  
509 *Semin. Immunol.* 38 (2018) 54–62. doi:10.1016/j.smim.2018.03.003.
- 510 [38] G. Arbore, E.E. West, R. Spolski, A.A.B. Robertson, A. Klos, C. Rheinheimer, P. Dutow, T.M.  
511 Woodruff, Z.X. Yu, L.A. O’Neill, R.C. Coll, A. Sher, W.J. Leonard, J. Köhl, P. Monk, M.A. Cooper,  
512 M. Arno, B. Afzali, H.J. Lachmann, A.P. Cope, K.D. Mayer-Barber, C. Kemper, T helper 1 immunity  
513 requires complement-driven NLRP3 inflammasome activity in CD4<sup>+</sup> T cells., *Science.* 352 (2016)  
514 aad1210. doi:10.1126/science.aad1210.
- 515 [39] C. Hess, C. Kemper, Complement-Mediated Regulation of Metabolism and Basic Cellular  
516 Processes., *Immunity.* 45 (2016) 240–54. doi:10.1016/j.immuni.2016.08.003.



- 517 [40] K.-H. Jang, Y.-J. Do, D. Son, E. Son, J.-S. Choi, E. Kim, AIF-independent parthanatos in the  
518 pathogenesis of dry age-related macular degeneration., *Cell Death Dis.* 8 (2017) e2526.  
519 doi:10.1038/cddis.2016.437.
- 520 [41] A. Sahaboglu, M. Barth, E. Secer, E.M. Del Amo, A. Urtti, Y. Arsenijevic, E. Zrenner, F. Paquet-  
521 Durand, Olaparib significantly delays photoreceptor loss in a model for hereditary retinal  
522 degeneration., *Sci. Rep.* 6 (2016) 39537. doi:10.1038/srep39537.
- 523 [42] K. Kovacs, A. Vaczy, K. Fekete, P. Kovari, T. Atlasz, D. Reglodi, R. Gabriel, F. Gallyas, B. Sumegi,  
524 PARP Inhibitor Protects Against Chronic Hypoxia/Reoxygenation-Induced Retinal Injury by  
525 Regulation of MAPKs, HIF1 $\alpha$ , Nrf2, and NF $\kappa$ B., *Invest. Ophthalmol. Vis. Sci.* 60 (2019) 1478–  
526 1490. doi:10.1167/iovs.18-25936.
- 527 [43] M. Schmidt, A. Giessl, T. Laufs, T. Hankeln, U. Wolfrum, T. Burmester, How does the eye  
528 breathe? Evidence for neuroglobin-mediated oxygen supply in the mammalian retina., *J. Biol.*  
529 *Chem.* 278 (2003) 1932–5. doi:10.1074/jbc.M209909200.
- 530 [44] M. Nita, A. Grzybowski, The Role of the Reactive Oxygen Species and Oxidative Stress in the  
531 Pathomechanism of the Age-Related Ocular Diseases and Other Pathologies of the Anterior and  
532 Posterior Eye Segments in Adults., *Oxid. Med. Cell. Longev.* 2016 (2016) 3164734.  
533 doi:10.1155/2016/3164734.
- 534 [45] P. Tokarz, K. Kaarniranta, J. Blasiak, Role of antioxidant enzymes and small molecular weight  
535 antioxidants in the pathogenesis of age-related macular degeneration (AMD)., *Biogerontology.*  
536 14 (2013) 461–82. doi:10.1007/s10522-013-9463-2.
- 537 [46] T. Finkel, Signal transduction by reactive oxygen species., *J. Cell Biol.* 194 (2011) 7–15.  
538 doi:10.1083/jcb.201102095.
- 539 [47] H. Yamashita, K. Horie, T. Yamamoto, T. Nagano, T. Hirano, Light-induced retinal damage in  
540 mice. Hydrogen peroxide production and superoxide dismutase activity in retina., *Retina.* 12  
541 (1992) 59–66.
- 542 [48] P. Kaczara, T. Sarna, J.M. Burke, Dynamics of H<sub>2</sub>O<sub>2</sub> availability to ARPE-19 cultures in models of  
543 oxidative stress., *Free Radic. Biol. Med.* 48 (2010) 1064–70.  
544 doi:10.1016/j.freeradbiomed.2010.01.022.
- 545 [49] A. Spector, W. Ma, R.R. Wang, The aqueous humor is capable of generating and degrading  
546 H<sub>2</sub>O<sub>2</sub>., *Invest. Ophthalmol. Vis. Sci.* 39 (1998) 1188–97.
- 547 [50] M. Martin, J. Leffler, K.I. Smolağ, J. Mytych, A. Björk, L.D. Chaves, J.J. Alexander, R.J. Quigg, A.M.

- 548 Blom, Factor H uptake regulates intracellular C3 activation during apoptosis and decreases the  
549 inflammatory potential of nucleosomes., *Cell Death Differ.* 23 (2016) 903–11.  
550 doi:10.1038/cdd.2015.164.
- 551 [51] M. Hollborn, C. Ackmann, H. Kuhrt, F. Doktor, L. Kohen, P. Wiedemann, A. Bringmann, Osmotic  
552 and hypoxic induction of the complement factor C9 in cultured human retinal pigment epithelial  
553 cells: Regulation of VEGF and NLRP3 expression., *Mol. Vis.* 24 (2018) 518–535.
- 554 [52] E.O. Samstad, N. Niyonzima, S. Nymo, M.H. Aune, L. Ryan, S.S. Bakke, K.T. Lappegård, O.-L.  
555 Brekke, J.D. Lambris, J.K. Damås, E. Latz, T.E. Mollnes, T. Espevik, Cholesterol crystals induce  
556 complement-dependent inflammasome activation and cytokine release., *J. Immunol.* 192  
557 (2014) 2837–45. doi:10.4049/jimmunol.1302484.
- 558 [53] Z.-M. Bian, M.G. Field, S.G. Elner, J.M. Kahlenberg, V.M. Elner, Distinct CD40L receptors mediate  
559 inflammasome activation and secretion of IL-1 $\beta$  and MCP-1 in cultured human retinal pigment  
560 epithelial cells., *Exp. Eye Res.* 170 (2018) 29–39. doi:10.1016/j.exer.2018.02.014.
- 561 [54] A. Kauppinen, H. Niskanen, T. Suuronen, K. Kinnunen, A. Salminen, K. Kaarniranta, Oxidative  
562 stress activates NLRP3 inflammasomes in ARPE-19 cells—implications for age-related macular  
563 degeneration (AMD)., *Immunol. Lett.* 147 (2012) 29–33. doi:10.1016/j.imlet.2012.05.005.
- 564 [55] C. Brandstetter, L.K.M. Mohr, E. Latz, F.G. Holz, T.U. Krohne, Light induces NLRP3 inflammasome  
565 activation in retinal pigment epithelial cells via lipofuscin-mediated photooxidative damage., *J.*  
566 *Mol. Med. (Berl).* 93 (2015) 905–16. doi:10.1007/s00109-015-1275-1.
- 567 [56] C. Brandstetter, J. Patt, F.G. Holz, T.U. Krohne, Inflammasome priming increases retinal pigment  
568 epithelial cell susceptibility to lipofuscin phototoxicity by changing the cell death mechanism  
569 from apoptosis to pyroptosis., *J. Photochem. Photobiol. B.* 161 (2016) 177–83.  
570 doi:10.1016/j.jphotobiol.2016.05.018.
- 571 [57] E. Asgari, G. Le Friec, H. Yamamoto, E. Perucha, S.S. Sacks, J. Köhl, H.T. Cook, C. Kemper, C3a  
572 modulates IL-1 $\beta$  secretion in human monocytes by regulating ATP efflux and subsequent NLRP3  
573 inflammasome activation., *Blood.* 122 (2013) 3473–81. doi:10.1182/blood-2013-05-502229.
- 574 [58] Y. Fukuoka, E.M. Medof, C5a receptor-mediated production of IL-8 by the human retinal  
575 pigment epithelial cell line, ARPE-19., *Curr. Eye Res.* 23 (2001) 320–5.
- 576 [59] D.N. Cortright, R. Meade, S.M. Waters, B.L. Chenard, J.E. Krause, C5a, but not C3a, increases  
577 VEGF secretion in ARPE-19 human retinal pigment epithelial cells., *Curr. Eye Res.* 34 (2009) 57–  
578 61. doi:10.1080/02713680802546658.

- 579 [60] J.L. Wagner, T.E. Hugli, Radioimmunoassay for anaphylatoxins: a sensitive method for  
580 determining complement activation products in biological fluids., *Anal. Biochem.* 136 (1984)  
581 75–88.
- 582 [61] M. Oppermann, O. Götze, Plasma clearance of the human C5a anaphylatoxin by binding to  
583 leucocyte C5a receptors., *Immunology.* 82 (1994) 516–21.
- 584

585 **DATA AVAILABILITY**

586 Original data supporting the findings of this study are available from the corresponding author upon  
587 reasonable request.

588

589 **ACKNOWLEDGEMENTS**

590 This project was supported by the Velux Foundation (Proj. Nr. 1103) to DP and VE. We thank Renate  
591 Foeckler, Andrea Dannullis and Elfriede Eckert for excellent technical support.

592

593 **AUTHOR CONTRIBUTIONS**

594 TT, NS, VE and DP designed research; TT, NS, MR, KK, VE and DP performed research; TT, NS, MR, KK,  
595 VE and DP analysed and interpreted the data; TT, NS, VE and DP wrote the manuscript. All authors  
596 provided input to edit the manuscript.

597

598 **COMPETING INTERESTS**

599 The authors declare no competing interests.

600 SUPPLEMENT

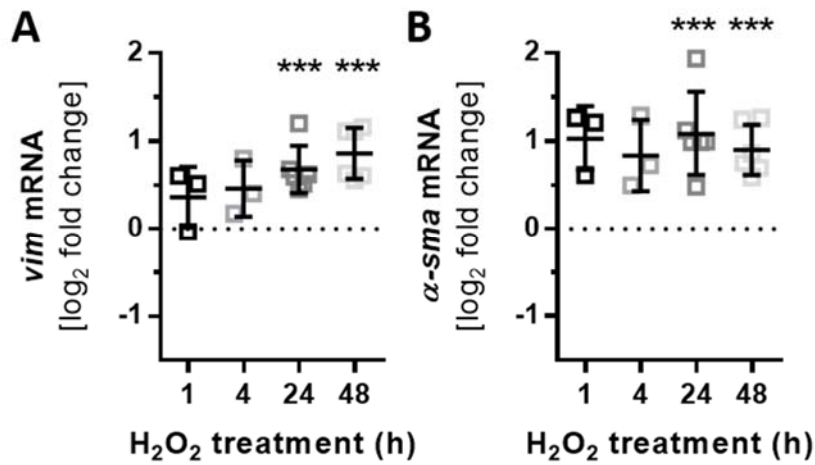

601  
602 **Sup. Fig. 1** H<sub>2</sub>O<sub>2</sub> treatment increased expression of epithelial-mesenchymal transition markers  
603 in ARPE-19 cells.  
604 ARPE-19 cells were treated either for 1, 4, 24 or 48 h with H<sub>2</sub>O<sub>2</sub>. (A) *vim* and (B) *α-sma*  
605 transcription was significantly increased after 24 h compared to the untreated control.  
606 Mean with standard deviation is shown, \*\*\* p < 0.001, unpaired, two-tailed,  
607 parametric t-test, dotted line depicts untreated control.

608

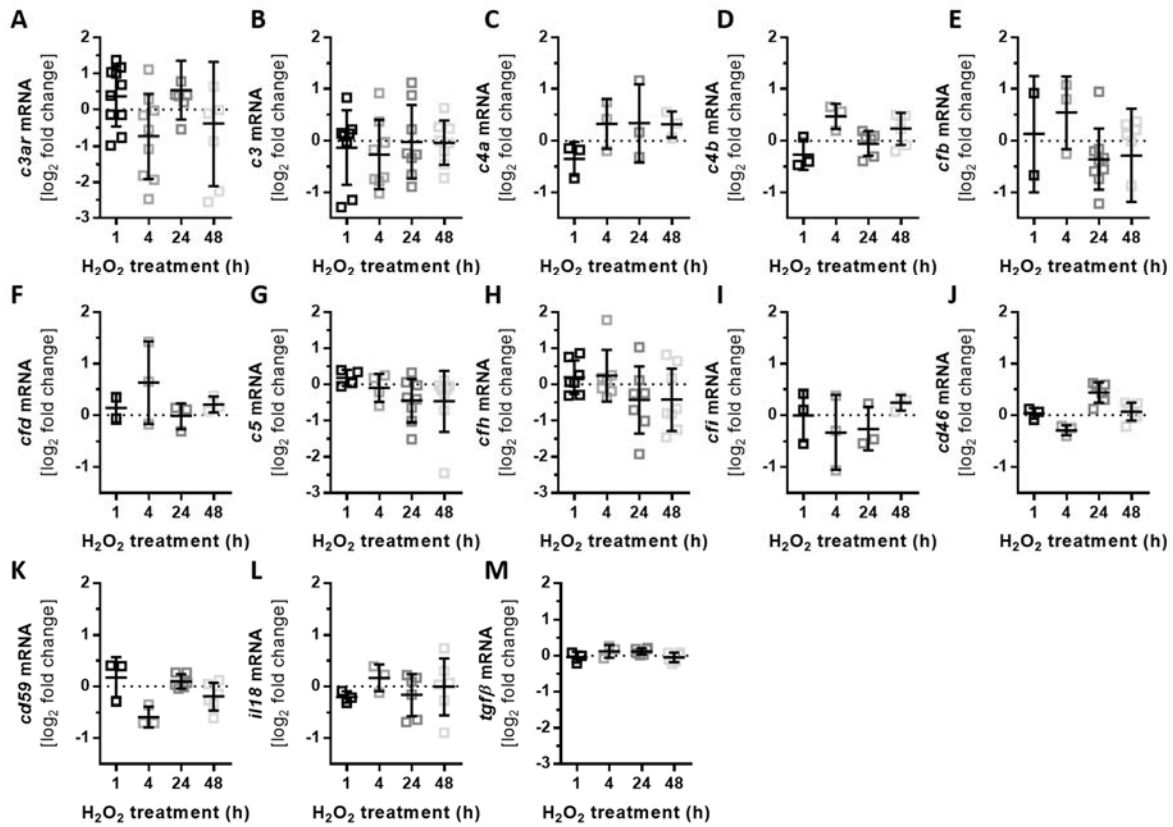

609

610 **Sup. Fig. 2** H<sub>2</sub>O<sub>2</sub> treatment did not influence the transcription levels of several genes in ARPE-  
611 19 cells.

612 ARPE-19 cells were treated either for 1, 4, 24 or 48 h with H<sub>2</sub>O<sub>2</sub>. mRNA levels were not  
613 significantly changed for: (A) *c3ar*, (B) *c3*, (C) *c4a*, (D) *c4b*, (E) *cfb*, (F) *cfd*, (G) *c5*, (H)  
614 *cfh*, (I) *cfi*, (J) *cd46*, (K) *cd59*, (L) *il18* and (M) *tgfb*. Mean with standard deviation,  
615 dotted line untreated control.

616



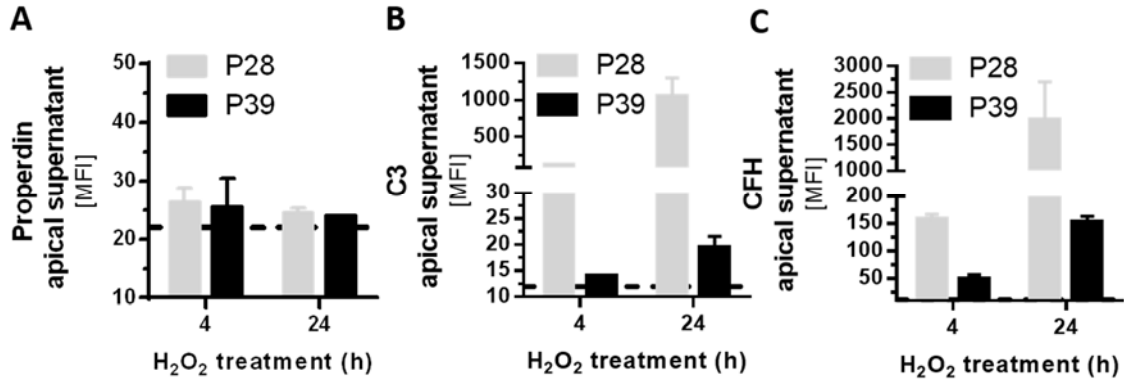

617

618 **Sup. Fig. 3**      **Increased complement component secretion in lower passage number of ARPE-19**  
619 **cells compared to higher passage number.**

620 ARPE-19 cells with passages 28 or 39 (latter used in the rest of this study) were treated  
621 either for 4 or 24 h with H<sub>2</sub>O<sub>2</sub>. The protein concentration of **(A)** properdin, **(B)** C3 and  
622 **(C)** CFH was determined in the apical supernatant using a multiplex immunoassay. **(A)**  
623 Properdin was not secreted by ARPE-19 cells of varied passages. ARPE-19 cells with  
624 lower passage number secreted more **(B)** C3 and **(C)** CFH than ARPE-19 cell with higher  
625 passage number into the apical supernatant.

626

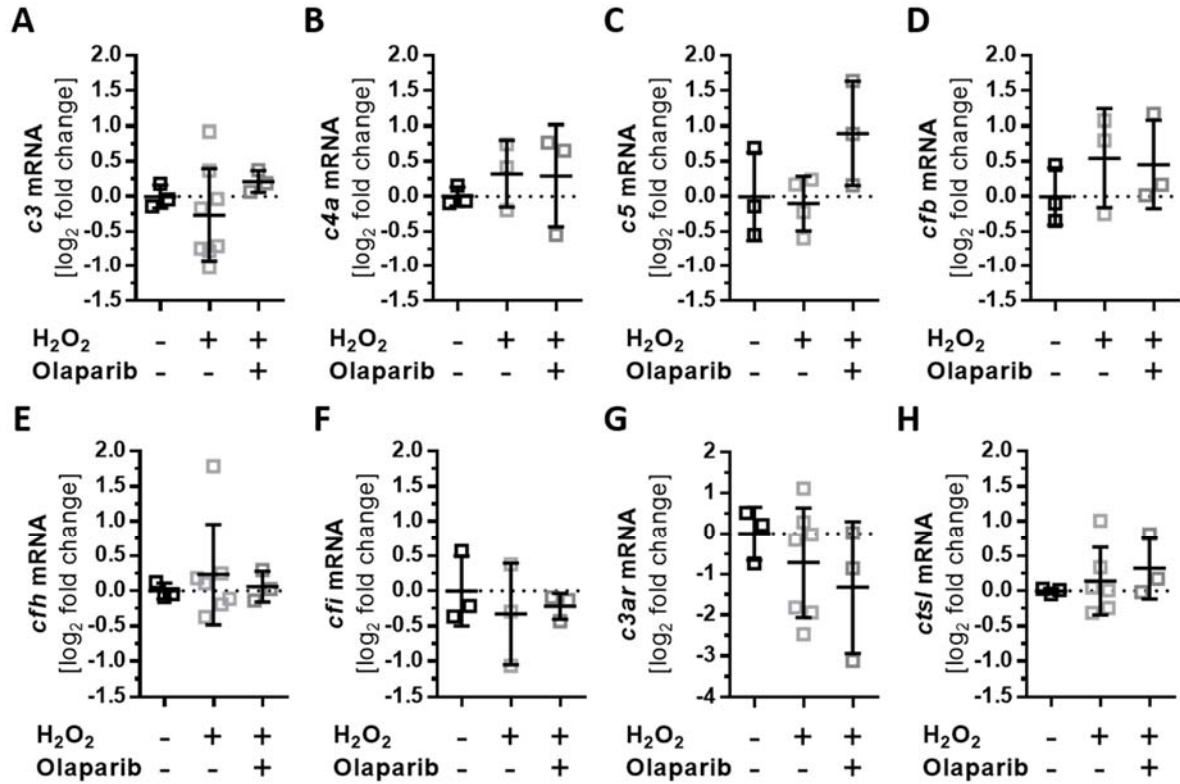

627

628 **Sup. Fig. 4**      **Stable expression of complement components and related genes after Olaparib and**  
 629 **oxidative stress treatment in ARPE-19 cells.**

630 ARPE-19 cells were treated for 4 h with H<sub>2</sub>O<sub>2</sub> and the effect of simultaneously added  
 631 olaparib on transcription was investigated. (A) *c3*, (B) *c4a*, (C) *c5*, (D) *cfb*, (E) *cfh*, (F)  
 632 *cfi*, (G) *c3aR* and (H) *ctsl* did not significantly change in stressed ARPE-19 cells following  
 633 olaparib addition.

634

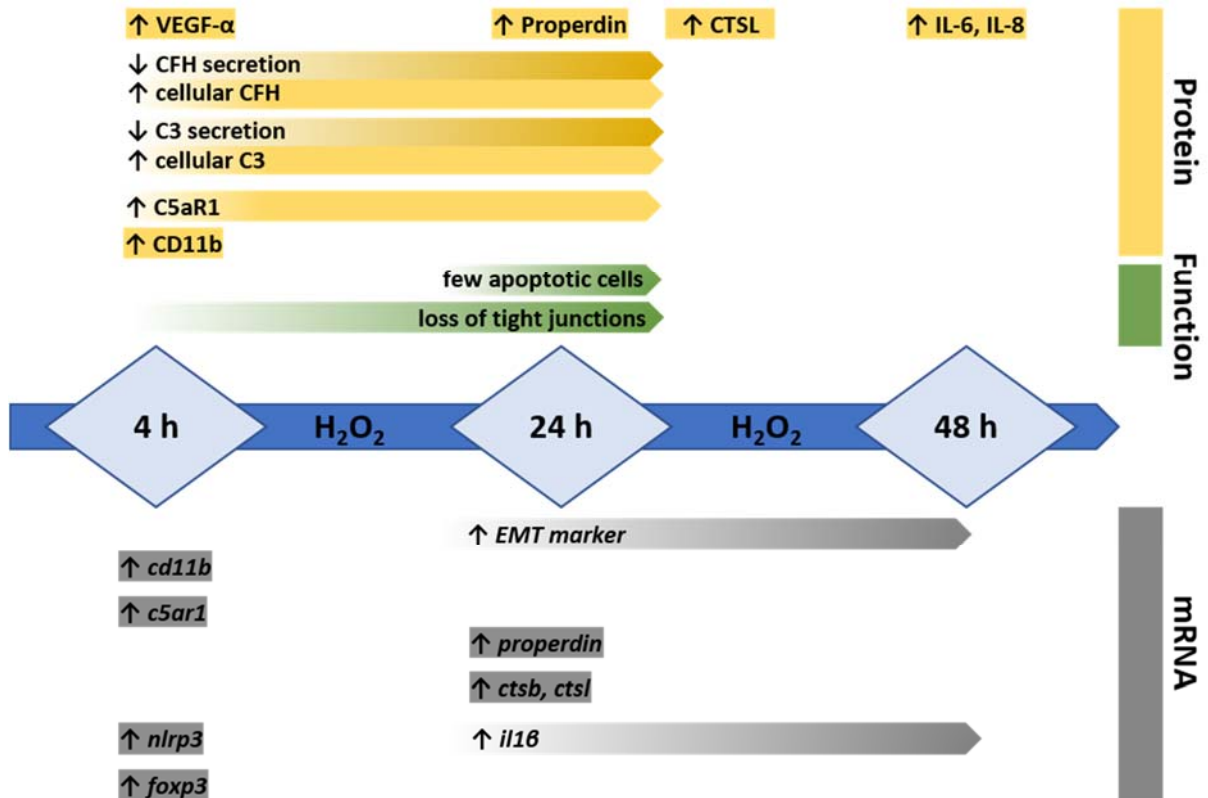

635

636

**Sup. Fig. 5 Time-dependent changes of H<sub>2</sub>O<sub>2</sub> treatment in ARPE-19 cells.**

637

ARPE-19 cells were treated for 4, 24 and 48 h with H<sub>2</sub>O<sub>2</sub>. Changes in mRNA expression (grey), function (green) and on protein level (yellow), which are described in this manuscript, are summarized in this scheme.

638

639

640

641 **Sup. Table 1: Primary and secondary antibodies**

| <b>Primary antibody</b>                 | <b>Species</b> | <b>Company</b>            | <b>Catalogue number</b> | <b>Dilution</b>        |
|-----------------------------------------|----------------|---------------------------|-------------------------|------------------------|
| anti-ZO-1                               | rabbit         | ThermoFisher              | 61-7300                 | IS 1: 300              |
| anti-CD11b                              | goat           | Biorbyt                   | orb19554                | IS 1:500               |
| anti-C5aR1                              | mouse          | Hycult                    | HM2094                  | IS 1:100,<br>WB 1:1000 |
| Anti-GAPDH-HRP                          | rabbit         | Cell signaling technology | 3683                    |                        |
| anti-Propertdin                         | goat           | Complement Technology     | A239                    | IS 1: 250              |
| anti-C3                                 | goat           | Bio Rad                   | AHP1752                 | IS 1:250               |
| anti-C3                                 | rabbit         | Abcam                     | Ab181147                | WB 1: 1000             |
| anti-CFH                                | goat           | Quidel                    | A312                    | IS 1:250               |
| anti-CTSL                               | mouse          | Abcam                     | ab6314                  | IS 1:500               |
| <b>Secondary antibody</b>               |                |                           |                         |                        |
| anti-mouse Ig-HRP                       | goat           | Dianova                   | 115-035-003             | WB 1:5000              |
| anti-rabbit Ig-HRP                      | goat           | Dianova                   | 111-035-003             | WB 1:5000              |
| anti-goat Ig-HRP                        | rabbit         | Dianova                   | 305-035-003             | WB 1:5000              |
| Anti-goat IgG Cy3                       | donkey         | Dianova                   | 705-165-147             | IS 1:500               |
| anti-Mouse IgG (H+L)<br>Alexa Fluor 488 | donkey         | ThermoFisher              | AB_2534069              | IS 1:500               |

642 WB – Western blot, IS – Immunostaining

643

644 **Sup. Table 2: QuantiTec PrimerAssays**

| <b>mRNA transcript</b>         | <b>name</b>   | <b>Catalogue number</b> |
|--------------------------------|---------------|-------------------------|
| <i>gapdh</i>                   | Hs_GAPDH_1_SG | QT00079247              |
| <i>c3</i>                      | Hs_C3_1_SG    | QT00089698              |
| <i>c3ar</i>                    | Hs_C3AR1_1_SG | QT00090398              |
| <i>cd11b</i>                   | Hs_ITGAM_1_SG | QT00031500              |
| <i>c4a</i>                     | Hs_C4A_1_SG   | QT00237160              |
| <i>c4b</i>                     | Hs_C4B_1_SG   | QT00237167              |
| <i>c5</i>                      | Hs_C5_1_SG    | QT00088011              |
| <i>c5ar1</i>                   | Hs_C5R1_1_SG  | QT00997766              |
| <i>cd46</i>                    | Hs_MCP_1_SG   | QT00073689              |
| <i>cd59</i>                    | Hs_CD59_1_SG  | QT00035952              |
| <i>cathepsin b</i>             | Hs_CTSB_1_SG  | QT00088641              |
| <i>cathepsin l</i>             | Hs_CTSL_1_SG  | QT01664978              |
| <i>complement factor b</i>     | Hs_BF_1_SG    | QT00012138              |
| <i>complement factor d</i>     | Hs_CFD_1_SG   | QT00212191              |
| <i>complement Factor h</i>     | Hs_CFH_1_SG   | QT00001624              |
| <i>complement Factor i</i>     | Hs_CFI_1_SG   | QT00213794              |
| <i>complement Factor p</i>     | Hs_CFP_1_SG   | QT00010514              |
| <i>nlrp3</i>                   | Hs_NLRP3_1_SG | QT00029771              |
| <i>forkhead-box-protein P3</i> | Hs_FOXP3_1_SG | QT00048286              |

645

646

647 **Sup. Table 3: In-house designed RT-qPCR primers**

| mRNA transcript                | sequence                                                   |
|--------------------------------|------------------------------------------------------------|
| <i>il1<math>\beta</math></i>   | fw: CTCGCCAGTGAAATGATGGCT<br>rv: GTCGGAGATTCGTAGCTGGAT     |
| <i>il18</i>                    | fw: ACTGTAGAGATAATGCACCCCG<br>rv: AGTTACAGCCATACCTCTAGGC   |
| <i>tgfb<math>\beta</math></i>  | fw: CATAGCTGACTTCAAGATGTGGT<br>rv: CCTAGTGAGACTTTGAACCGT   |
| <i>vim</i>                     | fw: TGTCCAATCGATGTGGATGTTTC<br>rv: TTGTACCATTCTTCTGCCTCCTG |
| <i><math>\alpha</math>-sma</i> | fw: GCCTGGTGTGTGACAATGG<br>rv: AAAACAGCCCTGGGAGCAT         |

648 fw - forward primer, rv - reverse primer

649
